# Supplementary material
Source: PubMed Central journal article supplement (PMC3067807)
Supplement: supp_85_5_2167__1.pdf [file supp_85_5_2167__1.pdf]

| Real time RT-PCR       |                    |                                   |                    |
|------------------------|--------------------|-----------------------------------|--------------------|
| Gene                   | Primers            | Sequence 5'-->3'                  | Size amplicon (bp) |
| pol                    | 5' QP1 xeno        | AACTAGGATTTGAGTCTATTAGAGTTTCC     | 185                |
|                        | 3' QP1 xeno        | CCTGGCTTTGTAAGGTGTGCAATCAAC       |                    |
| FR47/env               | 5' QPCR FR47       | GGACCTTATGTGGACTTAGATATGTGTGG     | 113                |
|                        | 3' QPCR FR47       | GGAATTCCTCACTAAATAGTTTAGCAAG      |                    |
| HSP70                  | 5'QP HSP70         | CCGAGGAGATCTCATCTATGGTGTATAAAG    | 159                |
|                        | 3'QP HSP70         | CATTTAGTCTGCAATGACACCAGCATCC      |                    |
| TH/bzip                | TH/bzip 1 rev      | GGAGTCGGGCATTCTCTTCA              | 102                |
|                        | TH/bzip 1 fwd      | GAACAACGAGGCCGCAAA                |                    |
| odc                    | ODC rev            | TGCGCTCAGTTCTGGTACTTCA            | 72                 |
|                        | ODC fwd            | AGGCCACACTGGCAACTCA               |                    |
| rpl8                   | RPL8 Int2 rev      | GGAAAGCACCTTGGCAAGA               | 108                |
|                        | RPL8 Int2 fwd      | AGCTTCGGGCTGTCGACTT               |                    |
| Cloning and sequencing |                    |                                   |                    |
| Target                 | Primers            | Sequence 5'-->3'                  | Size amplicon (bp) |
| Gap/ORF1/Gag           | 5' ORF1 seq 1      | TTGATAATATAGCTGGTTGGGGAG          | 1220               |
|                        | 3' ORF1 seq 1      | TTCATCCACATTGTATTTATAC            |                    |
| FR47/env short         | 5' FR47 seq 1      | GATCGGATCCCTCTTCTGCAGGATATACTCTG  | 1305               |
|                        | 3' FR47 seq 1      | CTGAATCGATTTAATAGCAGTGTCATGCAATTG |                    |
| FR47/env long          | 5' FR47 seq 2      | GATCGGATCCATGCGCAACAATAGCAATAATAC | 1717               |
|                        | 3' FR47 seq 1      | CTGAATCGATTTAATAGCAGTGTCATGCAATTG |                    |
| pol                    | 5' XLERV seq 1     | AACTATTGCCGTCATGGATACC            | 2062               |
|                        | 3' XLERV seq 1     | CATCACCATAGATGCCATTCAATG          |                    |
| 3'LTR                  | 5' QPCR FR47       | GGACCTTATGTGGACTTAGATATGTGTGG     | 1614               |
|                        | 3' Locus Xterv     | GATATCACCTATATGGCAAATTCATAAG      |                    |
| pol                    | 5' Pol seq 1       | GATCGAATTCATGCTAAAAGTCGGGGGAATAG  | 1357               |
|                        | 3' Pol seq 1       | CAATCCAAGAGCAGGAGCTTTAAC          |                    |
| LTR                    | 5' AseI LTR3       | GATCATAATTGATAGGGATTTAAAATTGC     | 510                |
|                        | 3' Locus Xterv     | GATATCACCTATATGGCAAATTCATAAG      |                    |
| sequencing             | 5' LTR interne     | CAAGTCCCTGATCAGCGCAC              |                    |
|                        | 5' ORF2 sequencing | CAGCACCTAGATCAGATCTGACTG          |                    |
|                        | 5' ORF1 sequencing | ATGTTATGAATACTGCCC                |                    |
|                        | 5'ORF1 bis seq     | TTGGACATTTCCAAGTGT                |                    |
|                        | 3' ORF1 QP2        | TGGTATTGGGCATTATCTGACTTGT         |                    |
|                        | 5' shift ORF1      | GTGCAGACATGTTTAGGGAATA            |                    |
| Xterv1 amplification   |                    |                                   |                    |
| Target                 | Primers            | Sequence 5'-->3'                  | Size amplicon (bp) |
| Gap/pol                | 5' QP2 ORF1        | AATACACATAAGTCACGAGTGTTCCAGGA     | 3243               |
|                        | 3' Pol seq 1       | CAATCCAAGAGCAGGAGCTTTAAC          |                    |
| pol                    | 5' Pol seq 1       | GATCGAATTCATGCTAAAAGTCGGGGGAATAG  | 451                |
|                        | 3' QP1 xeno        | CCTGGCTTTGTAAGGTGTGCAATCAAC       |                    |
| pol                    | 5' QP1 xeno        | AACTAGGATTTGAGTCTATTAGAGTTTCC     | 1091               |
|                        | 3' Pol seq 1       | CAATCCAAGAGCAGGAGCTTTAAC          |                    |
| pol                    | 5'QP2 xeno         | TGCCGTGCACACACTAACAGAACTGATG      | 1510               |
|                        | 3' Pol seq 2       | CTGATCTAGATTAAGTAATATCCACAATGGG   |                    |
| FR47/env               | 5' FR47 seq 3      | GATCGGATCCCTCTTCTGCAGGATATACTCTG  | 618                |
|                        | 3' QPCR FR47       | GGAATTCCTCACTAAATAGTTTAGCAAG      |                    |
| FR47/env               | 5' QPCR FR47       | GGACCTTATGTGGACTTAGATATGTGTGG     | 800                |
|                        | 3' FR47 seq 1      | CTGAATCGATTTAATAGCAGTGTCATGCAATTG |                    |
| LTR/ORF1               | 5' left ITR        | TTGCTTAATGCTGAATTTACAC            | 2420               |
|                        | 3' ORF1 seq 1      | TTCATCCACATTGTATTTATAC            |                    |
