# Supplementary material
Source: PubMed Central journal article supplement (PMC3067807)
Supplement: supp_85_5_2167__2.pdf [file supp_85_5_2167__2.pdf]

## Supplementary data 2 : *X. tropicalis* FR47/env ORF and related sequences

### 1/ Graphical representation of similarities between *X. tropicalis* FR47/env ORF and related sequences

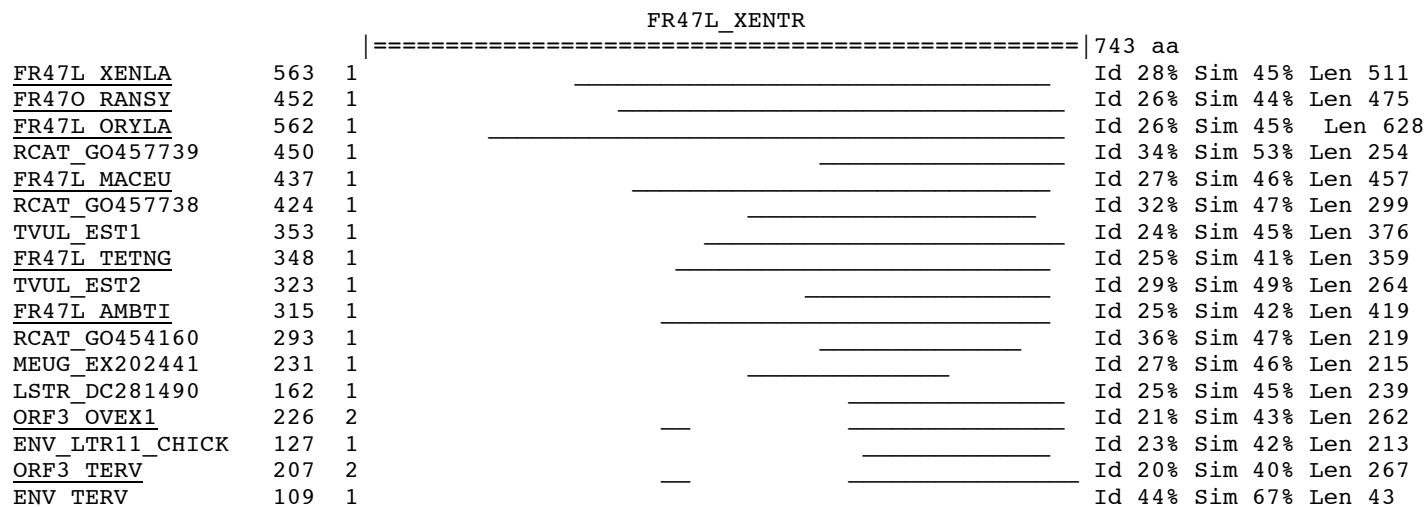

Underscored sequence identifiers refer to the sequences presented in Figure 1B.

### 2/ Sequence identifiers

| Seq Id          | Organism                   | Common name | Accession Number | Description                                                 |
|-----------------|----------------------------|-------------|------------------|-------------------------------------------------------------|
| -               | <i>Ambystoma mexicanum</i> | axolotl     | CO790043         | NT008C_E07 St18-22 Neural tube (NT)                         |
| ENV_LTR11_CHICK | <i>Gallus gallus</i>       | chick       | GgLTR11          | ERV1 Endogenous Retrovirus from chicken                     |
| ENV_TERV        | <i>Bonasa umbellus</i>     | grouse      | Q98U09_BONUM     | Bonasa umbellus Tetraonine endogenous retrovirus envelope p |
| FR47_RANSY      | <i>Rana sylvatica</i>      | Wood frog   | AAM47030.1       | freeze tolerance-associated protein FR47                    |
| FR47L_AMBTI     | <i>Ambystoma tigrinum</i>  | axolotl     | CN060395         | CN060395 CN053021 CN054769                                  |

|               |                                   |             |                |                                                                                                        |
|---------------|-----------------------------------|-------------|----------------|--------------------------------------------------------------------------------------------------------|
| FR47L_MACEU   | <i>Macropus eugenii</i>           | wallaby     | CU467811.3     | clone MEKBa-280J10                                                                                     |
| FR47L_ORYLA   | <i>Oryzias latipes</i>            | medaka      | none           | ORF:8444..10327 Frame -2 from MEDAKA1:12:15889514:15910701:1                                           |
| FR47L_TETNG   | <i>Tetraodon nigroviridis</i>     | tetraodon   | none           | lcl Sequence 1 ORF:2543..3622 Frame -2 on 19 dna:chromosome:chromosome:TETRAODON8:19:4559354:4565715:1 |
| FR47L_XENLA   | <i>Xenopus laevis</i>             | Clawed frog | BC084895.1     | Xenopus laevis cDNA clone IMAGE:3398112                                                                |
| FR47L_XENTR   | <i>Xenopus tropicalis</i>         | Clawed frog | HM765512       | XTERV1 ORF3 plus ORF4                                                                                  |
| FR47O_RANSY   | <i>Rana sylvatica</i>             | Wood frog   | AY100690       | ORF:1227..3176 Frame +3 of AY100690                                                                    |
| LSTR_DC281490 | <i>Lonchura striata domestica</i> | finch       | DC281490       | clone OV02E08                                                                                          |
| MEUG_EX202441 | <i>Macropus eugenii</i>           | wallaby     | EX202441       | SGT20u4_D03                                                                                            |
| ORF3_OVEX1    | <i>Gallus gallus</i>              | chick       | NP_001159385.1 | hypothetical protein LOC422926 [Gallus gallus]                                                         |
| ORF3_TERV     | <i>Taeniopygia guttata</i>        | zebra finch | none           | OVEX1 ortholog;taeGut1, chr. 4, + strand, 65,939,815 to 65,948,592                                     |
| RCAT_GO454160 | <i>Rana catesbeiana</i>           | frog        | GO454160       | rcat_evr_988858                                                                                        |
| RCAT_GO457738 | <i>Rana catesbeiana</i>           | frog        | GO457738       | clone rcat_evr_513_330                                                                                 |
| RCAT_GO457739 | <i>Rana catesbeiana</i>           | frog        | GO457739       | clone rcat_evr_513_330                                                                                 |
| TVUL_EST1     | <i>Trichosorus vulpecula</i>      | possum      | EC333785       | EC333785 EC360884 EC282715 EG612389                                                                    |
| TVUL_EST2     | <i>Trichosorus vulpecula</i>      | possum      | EC288767       | EC288767 EG596005 EC343934 EC33942                                                                     |
