# Supplementary material
Source: PubMed Central journal article supplement (PMC3067807)
Supplement: supp_85_5_2167__4.pdf [file supp_85_5_2167__4.pdf]

## Supplementary data 4 . : Estimation of the copy number of full-length XTERV1 elements by *in silico*

1. *In silico* search of full-length XTERV1-like elements using XTERV1 FR47env ORF amino acid sequence as a query in tblastn.

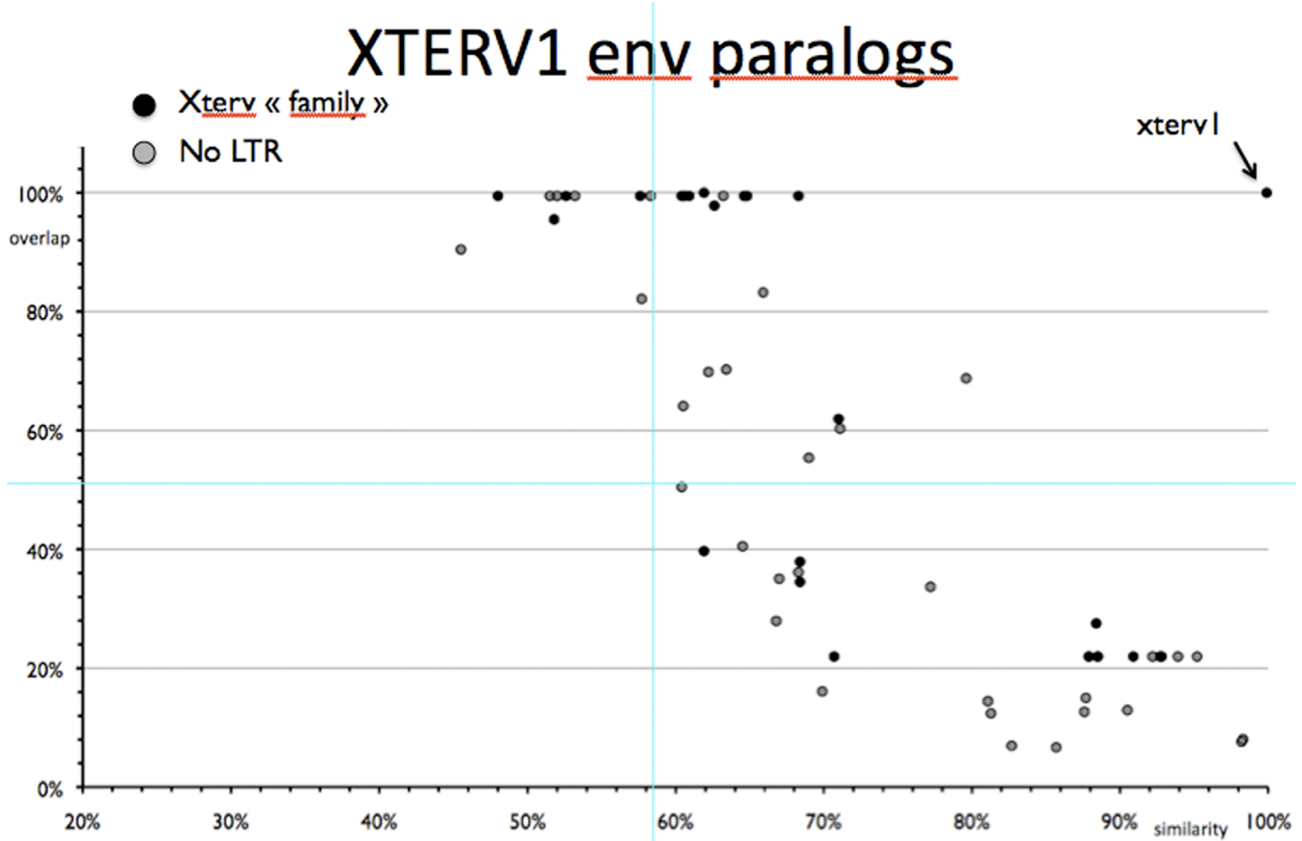

2. *In silico* genomic mapping of the 10 XTERV1 full-length copies identified within *X. tropicalis* genome.

| Scaffold match | Name of XTERV1 elements | Scaffold size | Identity % | Alignment size | Coverage % | XTERV1 Align .start | XTERV1 Align .stop | Scaffold match 5'boundary |
|----------------|-------------------------|---------------|------------|----------------|------------|---------------------|--------------------|---------------------------|
| 387            | XTERV1                  | 1134611       | 99.9       | 742            | 100        | 1                   | 742                | 1125395                   |
| 3285           | XTERV1-like_3285        | 12688         | 84.2       | 165            | 21.96      | 573                 | 742                | 5751                      |
| 107            | XTERV1-like_107         | 2722880       | 49.3       | 282            | 37.93      | 5                   | 282                | 705974                    |
| 577            | XTERV1-like_577         | 713541        | 47.9       | 739            | 99.45      | 5                   | 742                | 195930                    |
| 941            | XTERV1-like_941         | 272995        | 47.8       | 751            | 99.45      | 5                   | 742                | 144730                    |
| 397            | XTERV1-like_397         | 1109245       | 44.4       | 738            | 99.45      | 5                   | 742                | 413611                    |
| 1234           | XTERV1-like_1234        | 147483        | 42.9       | 294            | 39.7       | 5                   | 295                | 17421                     |
| 527            | XTERV1-like_527         | 813203        | 42.8       | 729            | 97.8       | 17                  | 742                | 393018                    |
| 1054           | XTERV1-like_1054        | 198251        | 39.8       | 783            | 99.45      | 5                   | 742                | 110072                    |
| 685            | XTERV1-like_685         | 552873        | 38.9       | 792            | 99.45      | 5                   | 742                | 275832                    |
| 397            | XTERV1-like_397         | 1109245       | 38         | 707            | 95.5       | 5                   | 704                | 242535                    |
