# Supplementary material
Source: PubMed Central journal article supplement (PMC3067807)

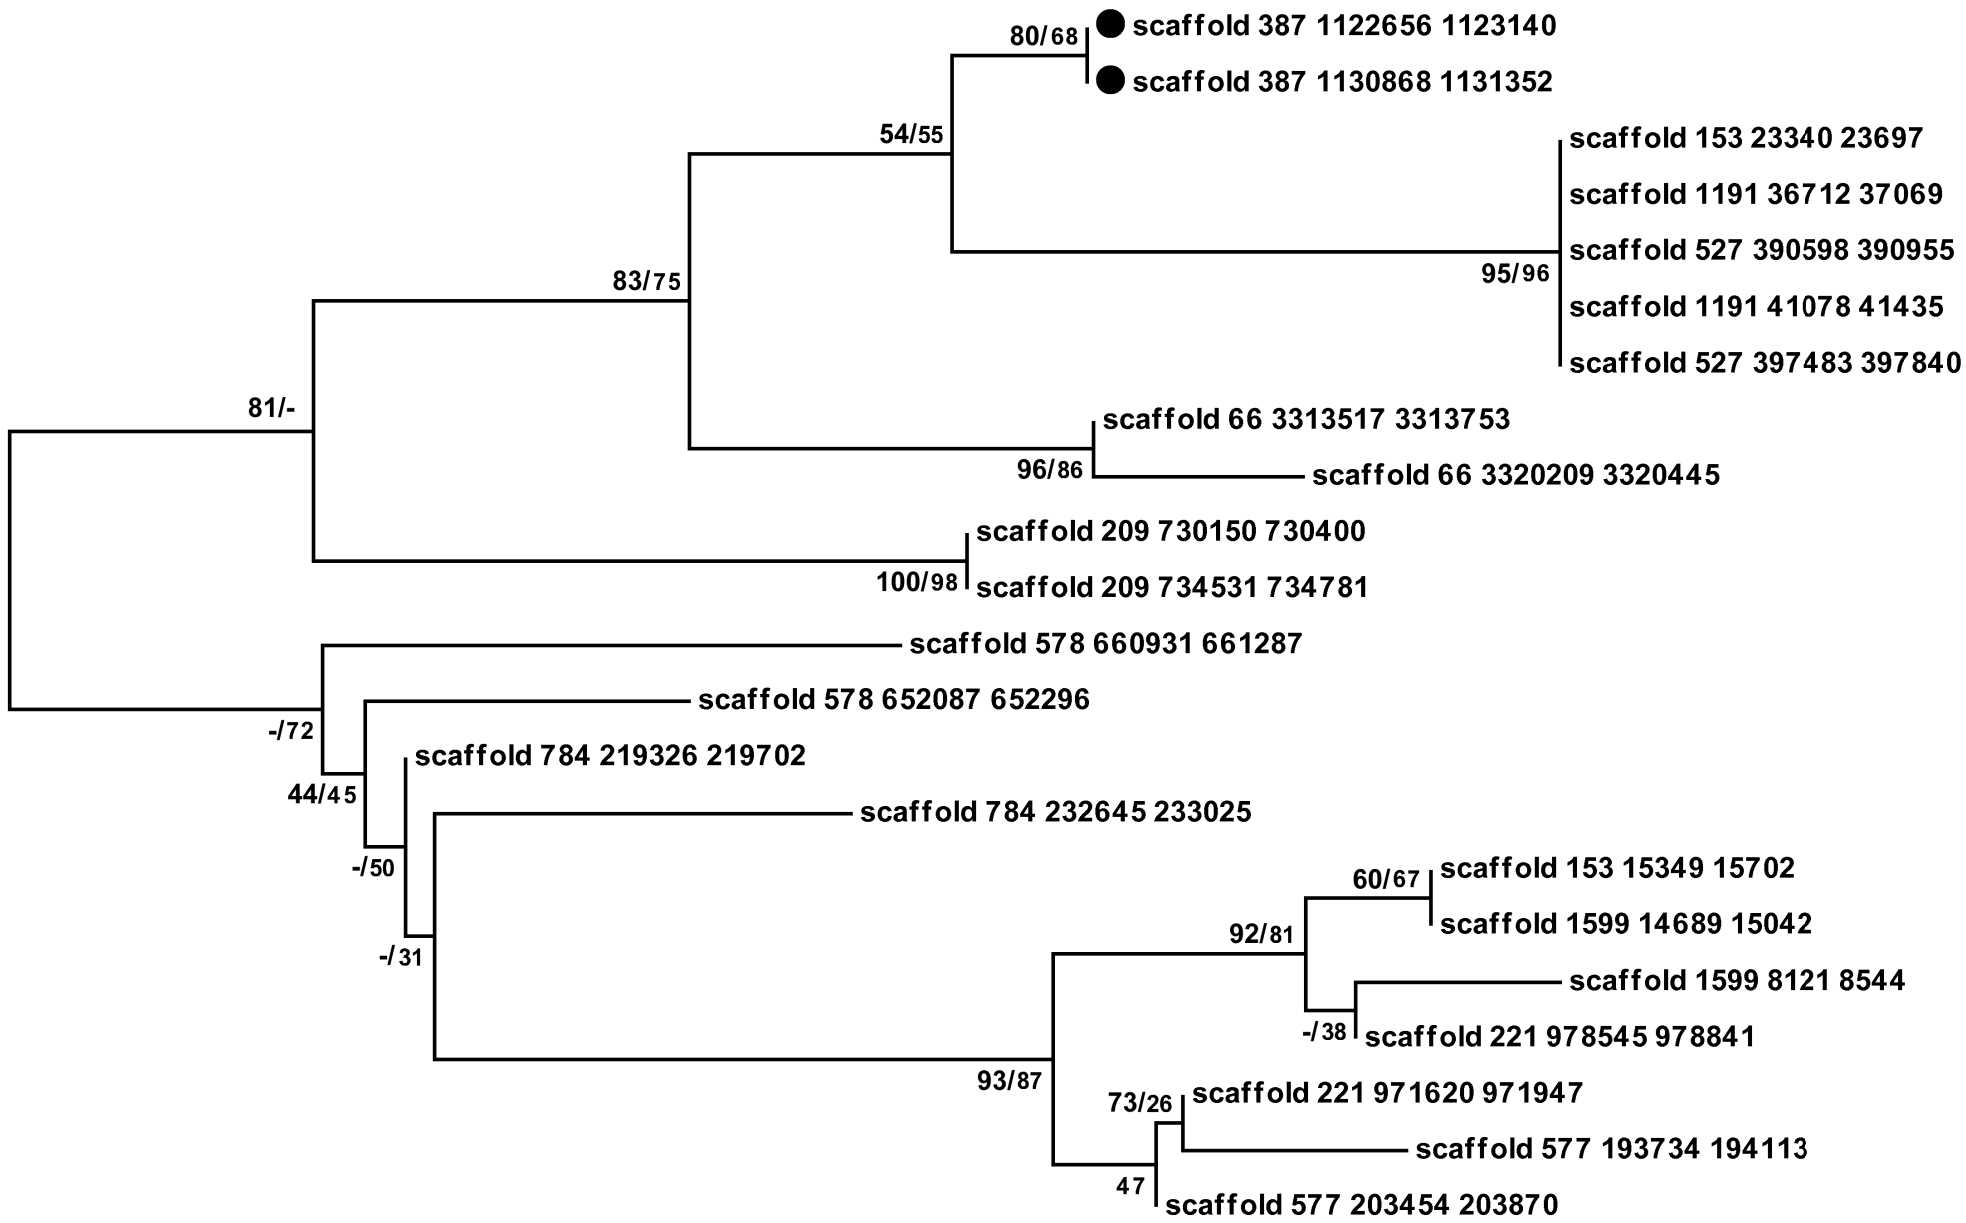

0,005

Supplement: supp_85_5_2167__5.pdf [file supp_85_5_2167__5.pdf]

## Comparison between XTERV1 and XLERV1

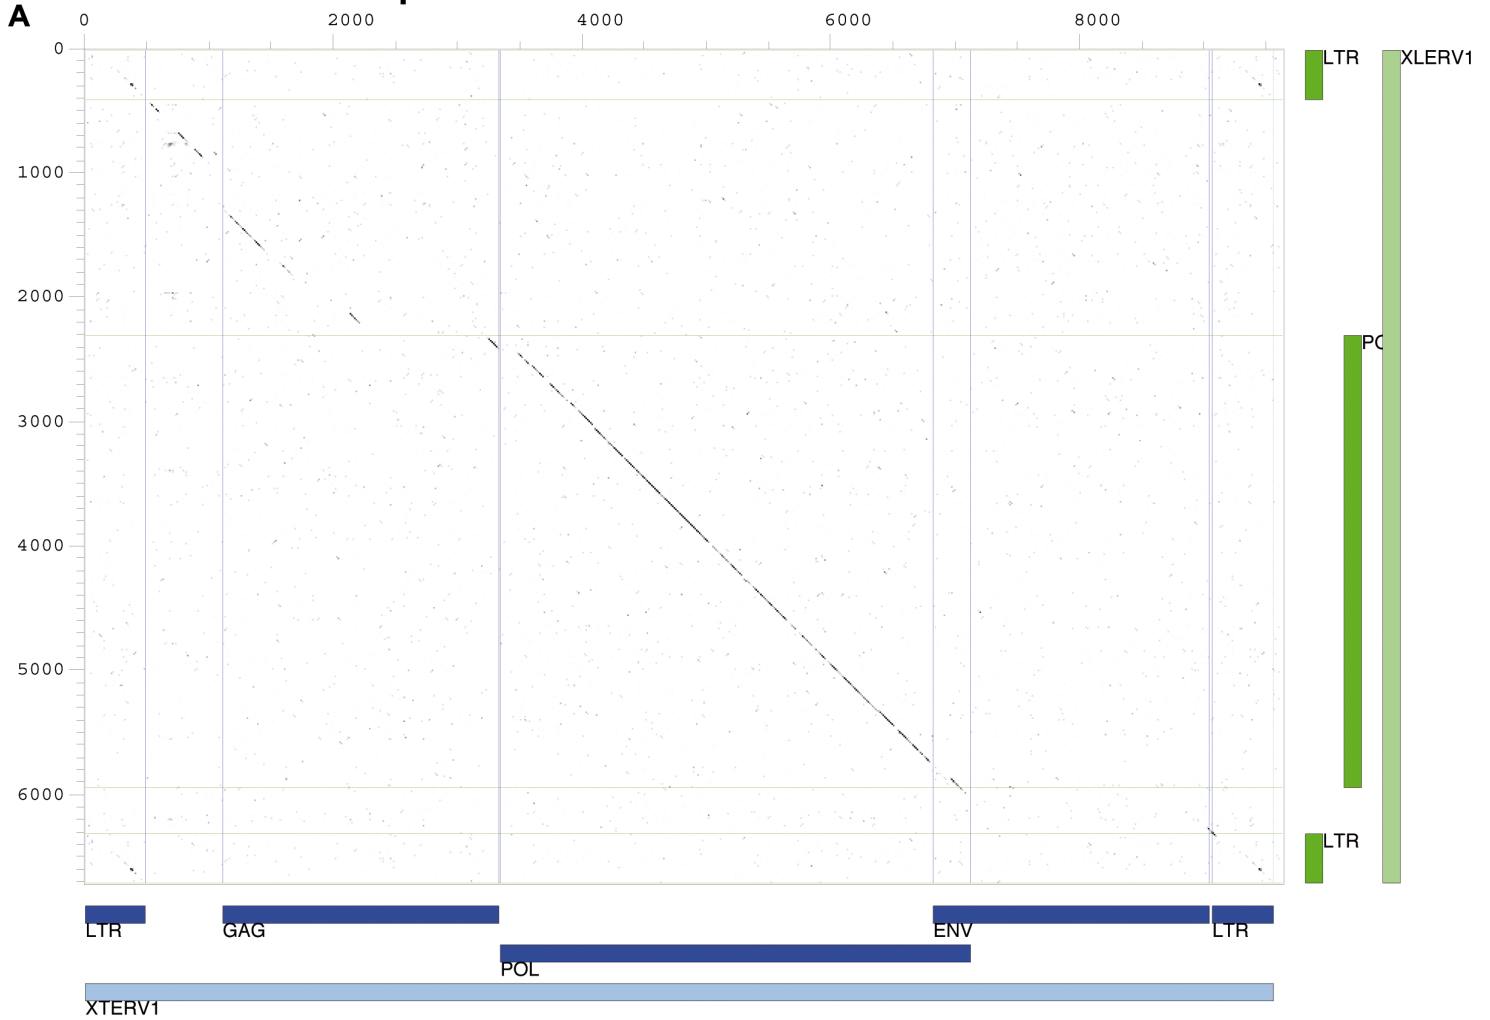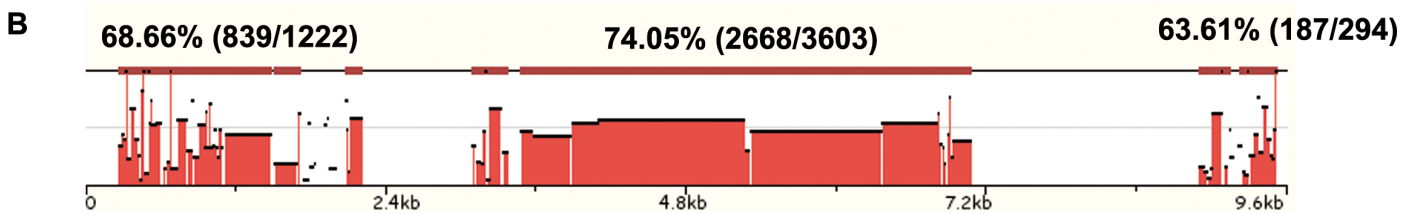

Supplement: supp_85_5_2167__6.pdf [file supp_85_5_2167__6.pdf]
